# Supplementary material for: Acetylation improves thermal stability and transmittance in FOLED substrates based on nanocellulose films
Source: Royal Society of Chemistry journal article supplement (doi:10.1039/c7ra11134g), 2018-01-01
Supplement: c7ra11134g1.pdf [file c7ra11134g1.pdf]

## Electronic supplementary information

### Acetylation improving the thermal stability and transmittance of FOLED substrate based nanocellulose film

Shuang Yang<sup>a,b</sup>, Qiuxia Xie<sup>a,b</sup>, Xiuyu Liu<sup>a,b</sup>, Min Wu<sup>a,b</sup>, Shuangfei Wang<sup>a,b</sup>, and Xueping Song<sup>a,b</sup> \*

a. College of Light Industry and Food Engineering, Guangxi University, Nanning, 530004, PR China

b. Guangxi Key Laboratory of Clean Pulp & Papermaking and Pollution Control, Nanning 530004, PR China

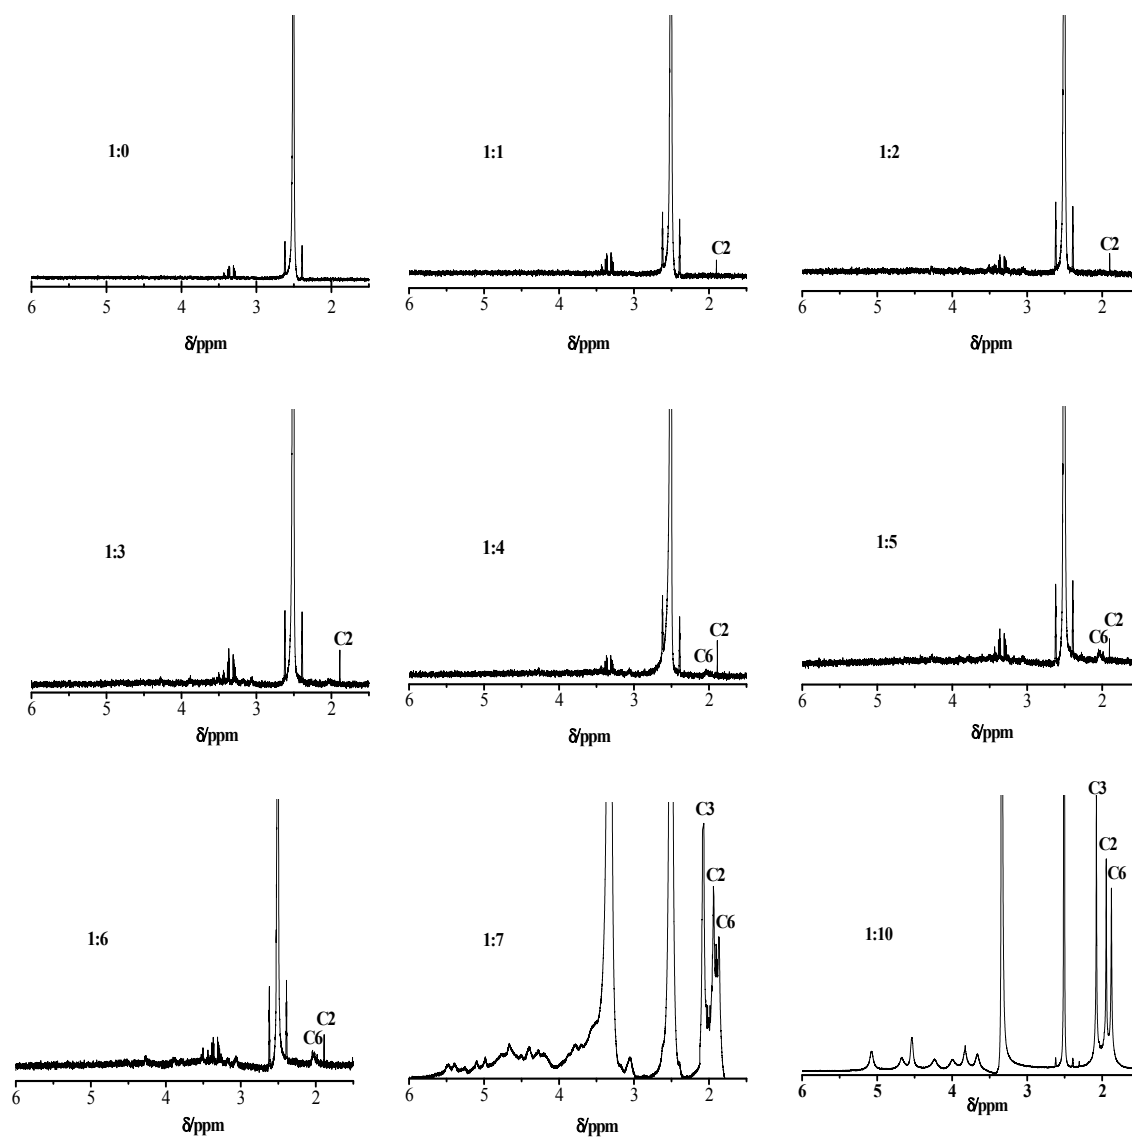

Fig. S1 Effects of different NFC: AA ratios on the <sup>1</sup>H-NMR spectra of NFC

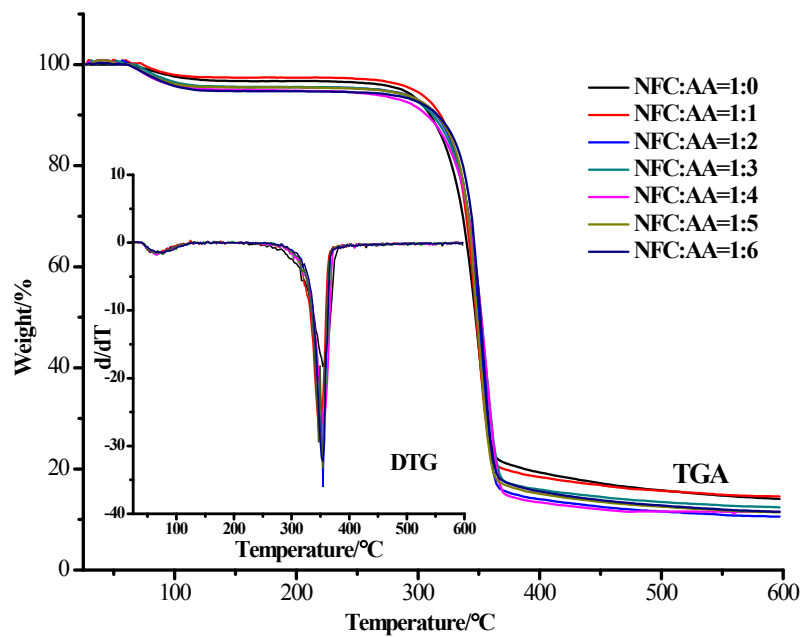

**Fig. S2 Effects of different NFC: AA ratios on the TGA and DTG of NFC films**

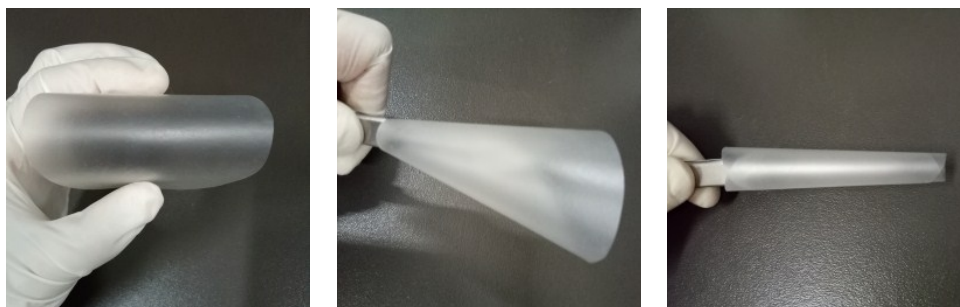

**Fig. S3 Bending degree of acetylated NFC film (NFC: AA ratio was 1:3)**
